# Supplementary material for: Reusable alcohol oxidase–nPtCu/alginate beads for highly sensitive ethanol assay in beverages
Source: Royal Society of Chemistry journal article supplement (doi:10.1039/d2ra02106d), 2022-01-01
Supplement: d2ra02106d1.pdf [file d2ra02106d1.pdf]

## Electronic Supplementary Information

### Reusable alcohol oxidase-nPtCu/alginate beads for highly sensitive ethanol assay in beverages

Nataliya Stasyuk<sup>a,b\*</sup>, Olha Demkiv<sup>a</sup>, Galina Gayda<sup>a</sup>, Oksana Zakalska<sup>a</sup>, Andriy Zakalskiy<sup>a,d</sup>, Roman Serkiz<sup>a,c</sup>, Taras Kavetsky<sup>b,e</sup> and Mykhailo Gonchar<sup>a,b\*</sup>

<sup>a</sup>Institute of Cell Biology, National Academy of Sciences of Ukraine, Lviv, Ukraine; stasuk\_natalia@ukr.net (N.S.); demkiv@yahoo.com (O.D.) galina.gayda@gmail.com (G.G.); zakalska@yahoo.com (O.Z.); andriy.zakalskiy@yahoo.com (A.Z); mykhailo1952@gmail.com (M.G.)

<sup>b</sup>Drohobych Ivan Franko State Pedagogical University, Drohobych, Ukraine (N.S., T.K., M.G.);

<sup>c</sup>Ivan Franko National University of Lviv, Department of Solid State Physics, Lviv, Ukraine; rserkiz@gmail.com (R.S.);

<sup>d</sup>Institute of Animal Biology of the National Academy of Agrarian Sciences of Ukraine, Lviv, Ukraine;

<sup>e</sup>The John Paul II Catholic University of Lublin, 20-950 Lublin, Poland kavetsky@yahoo.com (T.K.).

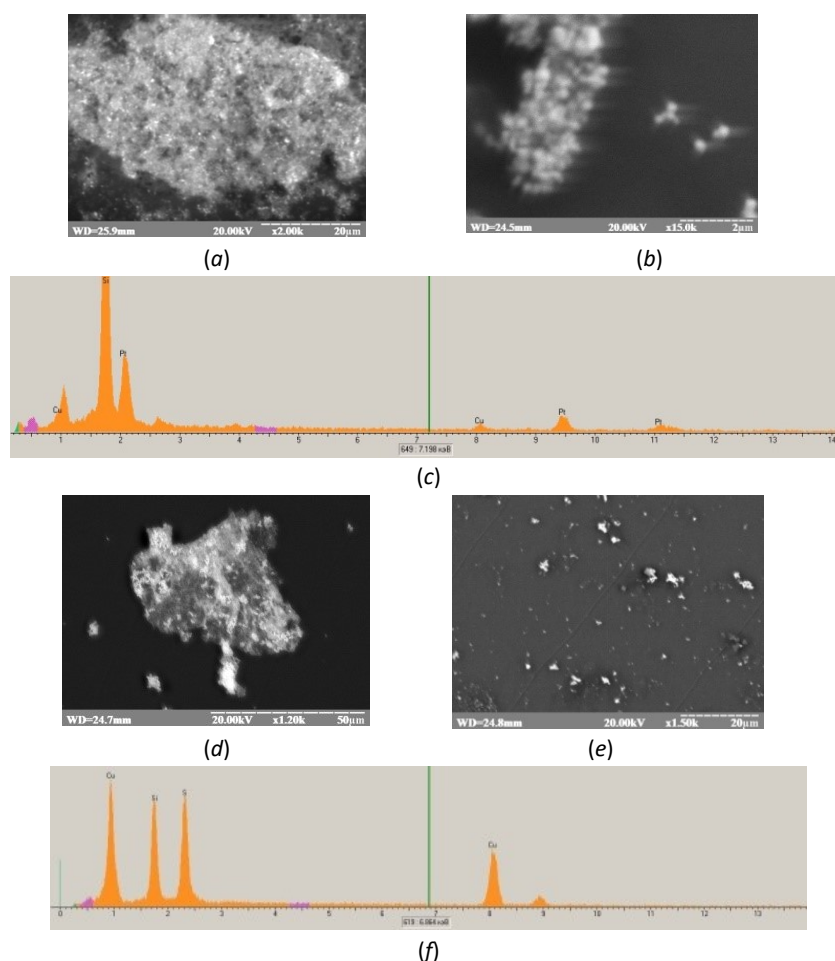

**Fig. ESI 1.** Characteristics of the nPtCu (a – c) and nCu (d – f): SEM images for  $\times 2.000$  magnification (a) (scale bar 20  $\mu\text{m}$ ), for  $\times 15.000$  magnification (scale bar 2  $\mu\text{m}$ ) (b), for  $\times 1.200$  magnification (scale bar 50  $\mu\text{m}$ ) (d) and for  $\times 6.000$  magnification (scale bar 10  $\mu\text{m}$ ) (e); X-ray spectral microanalysis (c and f). The accelerating voltage was 20 kV for all images.

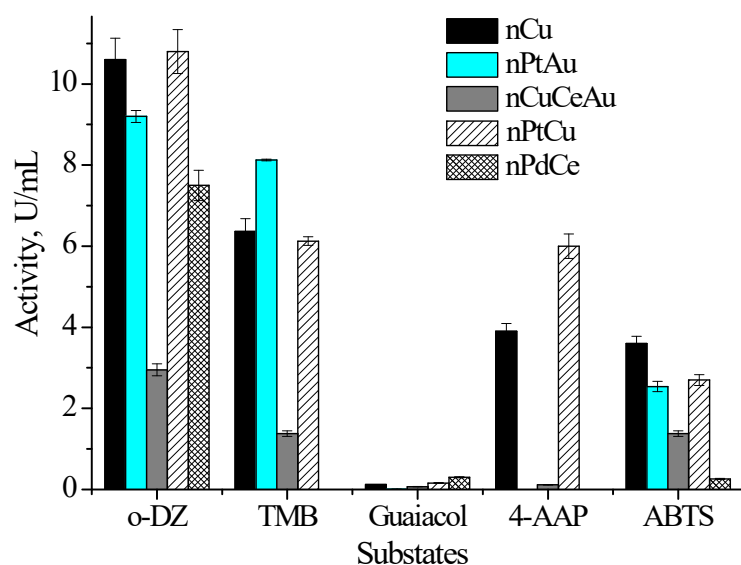

**Fig. ESI 2.** Substrate specificity of synthesized NZs in peroxidative reaction. ABTS, 4-AAP, guaiacol, TMB and *o*-DZ. ABTS – (2,2'-azino-bis(3-ethylbenzothiazoline-6-sulfonic acid)); 4-AAP – 4-aminoantipyrine; TMB – 3,3',5,5' -tetramethyl benzidine and *o*-DZ – *o*-dianisidine.

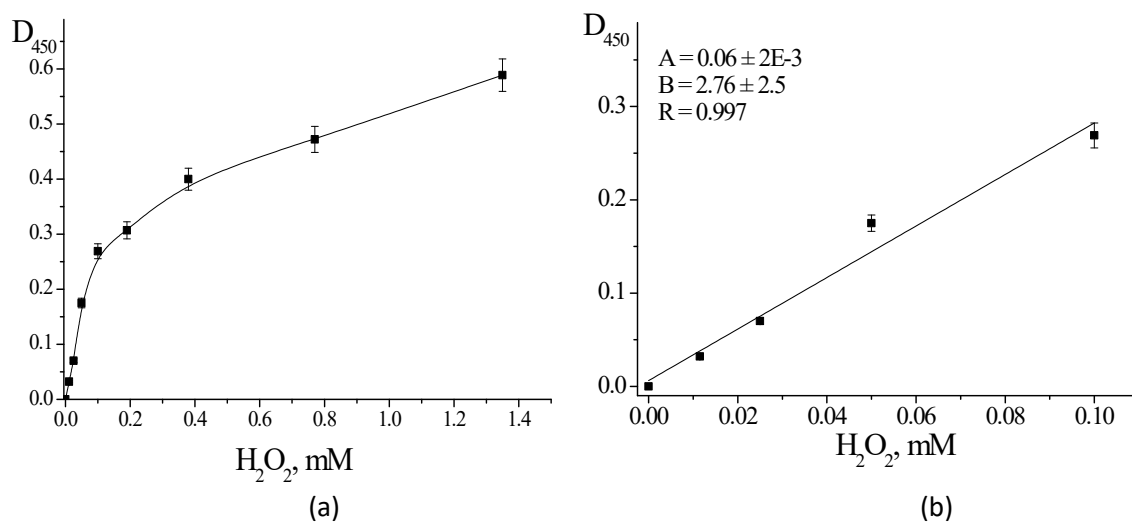

**Fig. ESI 3.** The dependence of OD of reaction mixture on the concentrations of H<sub>2</sub>O<sub>2</sub> in final mixture (a) and linear calibration curve (b) for alginate beads loaded with nPtCu. *A*, *B* - parameters for the linear regression line; *R* - correlation coefficient.

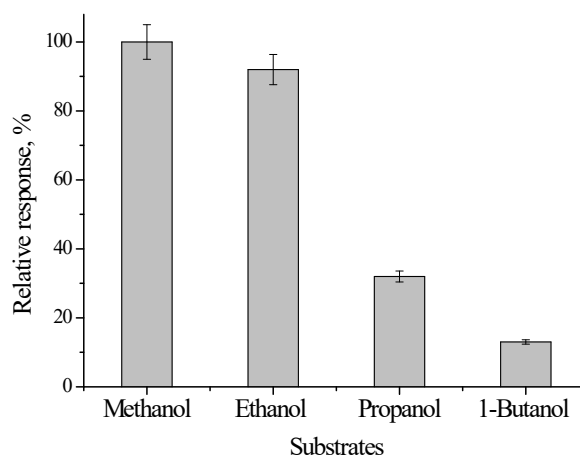

**Fig. ESI 4.** Relative response of nPtCu-AO/alginate beads toward various 1 mM alcohols. The analytical signal was exposed in relative units (%) referred to the maximum value for methanol (100%).

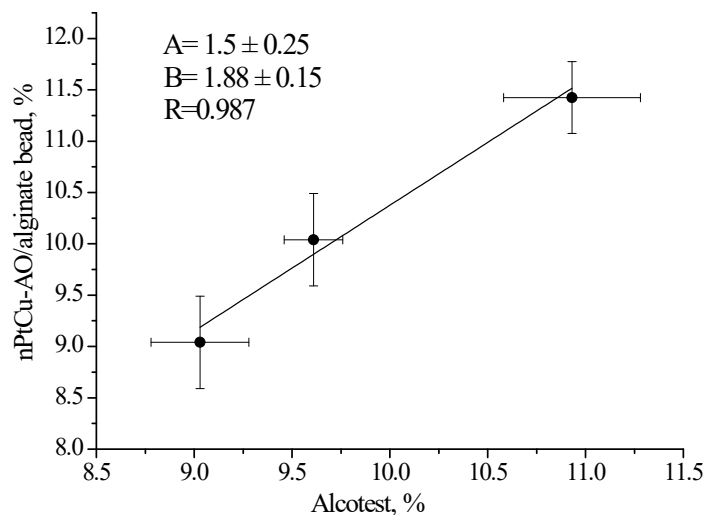

**Fig. ESI 5.** Correlations between the results of ethanol determination by two methods: “nPtCu-AO/alginate bead” and reference method by the use of “Alcotest”. Tested samples: liquor “Aperitif” (**a**), champagne “Latini Sparkling” (**b**), and wine “Aznauri” (**c**).

**Table ESI 1.** Methods of synthesis of NZs

| No | NZs    | Mixture 1                                                                         | Mixture 2                                                                                     | Mixture 3                       |
|----|--------|-----------------------------------------------------------------------------------|-----------------------------------------------------------------------------------------------|---------------------------------|
| 1  | PtCu   | 5 mL 10 mM H <sub>2</sub> PtCl <sub>6</sub> + 10 mL 15 mM CTAB + 0.2 ml 100 mM AA | Mixture 1 + 5 mL 50 mM CuSO <sub>4</sub> + 0.2 mL 100 mM AA                                   | -                               |
| 2  | PdCe   | 5 mL 50 mM CeCl <sub>3</sub> + 10 mL 15 mM CTAB + 0.1 mL 10 mM AA                 | Mixture 1 + 5 mL 10 mM PdCl <sub>3</sub> + 0.5 mL 10 mM AA                                    | -                               |
| 3  | PtCu   | 2 mL 10 mM H <sub>2</sub> PtCl <sub>6</sub> + 10 mL 15 mM CTAB, + 0.2 mL 10 mM AA | Mixture 1 + 5 mL 10 mM CuSO <sub>4</sub> + 0.2 mL 10 mM AA                                    | -                               |
| 4  | PtAu   | 2 mL 10 mM H <sub>2</sub> PtCl <sub>6</sub> + 10 mL 15 mM CTAB + 0.1 mL 10 mM AA  | Mixture 1 + 2 mL 17 mM HAuCl <sub>4</sub> + 0.2 mL 10 mM AA                                   | -                               |
| 5  | FePtAu | 0.5 mL 100 mM FeCl <sub>2</sub> + 10 mL 15 mM CTAB + 0.1 mL 10 mM AA              | Mixture 1 + 0.5 mL 10 mM H <sub>2</sub> PtCl <sub>6</sub> + 0.2 mL 10 mM AA + 0.2 mL 10 mM KJ | 0.1 mL 17 mM HAuCl <sub>4</sub> |
